# Supplementary figures and images for: Comparison of ARIMA and LSTM in Forecasting the Incidence of HFMD Combined and Uncombined with Exogenous Meteorological Variables in Ningbo, China
Source: MDPI journal article supplement (doi:10.3390/ijerph18116174), 2021-06-07

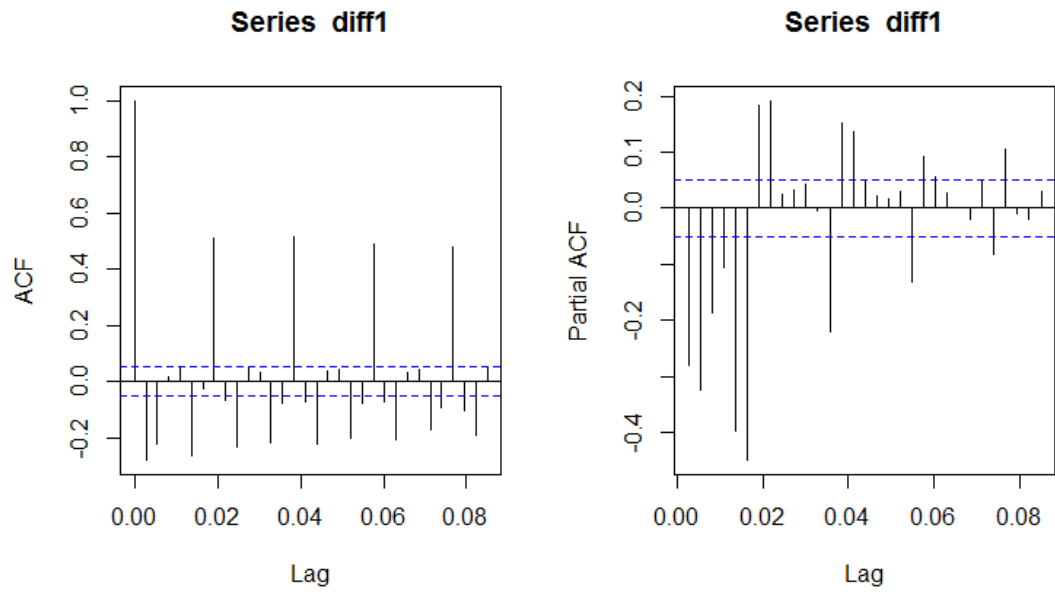

**Figure S1. The ACF graph and PACF graph of daily HFMD incidence series**

Supplement: s1 [file s1]
